# Supplementary material for: The Neglected Sibling: NLRP2 Inflammasome in the Nervous System
Source: Preprints.org preprint supplement (doi:10.20944/preprints202307.0152.v1), 2023-07-04
Supplement: Supplementary file 1 [file Supplementary material NLRP2.docx]

**Supplementary material**

**The neglected sibling: NLRP2 inflammasome in the nervous system**

László Ducza1†*, Botond Gaál†1,

1Department of Anatomy, Histology and Embryology, Faculty of Medicine, University of

Debrecen, Hungary, Nagyerdei krt. 98, H-4032 Debrecen, Hungary

† Equal contributor

* Correspondence: László Ducza, [ducza.laszlo@anat.med.unideb.hu](mailto:ducza.laszlo@anat.med.unideb.hu)

**Table S1. List of NLRP2 interactors involved in neuropathologies (in order of interaction score)**

|  | **Node protein hits** | **Full name** | **Interaction score** |
| --- | --- | --- | --- |
| **1** | SLA | Src-like-adapter;Adapter protein | 0.752 |
| **2** | BECN1 | Beclin-1 | 0.664 |
| **3** | PCDH11X | Protocadherin-11 X-linked; Potential calcium-dependent cell-adhesion protein | 0.547 |
| **4** | GYG2 | Glycogenin-2 | 0.515 |
| **5** | MRE11A | Double-strand break repair protein MRE11 | 0.490 |
| **6** | SUGT1 | SGT1 homolog, MIS12 kinetochore complex assembly cochaperone | 0.485 |
| **7** | EPS15 | Epidermal growth factor receptor substrate 15 | 0.468 |
| **8** | NEUROD1 | Neurogenic differentiation factor 1 | 0.466 |
| **9** | CAPN6 | Calpain-6 | 0.462 |
| **10** | TXLNG | Gamma-taxilin | 0.455 |
| **11** | DLGAP2 | Disks large-associated protein 2 | 0.449 |
| **12** | APLNR | Apelin receptor | 0.445 |
| **13** | SLC29A1 | Solute carrier family 2 | 0.444 |
| **14** | AS3MT | Arsenite methyltransferase | 0.423 |
| **15** | CCDC50 | Coiled-coil domain-containing protein 50 | 0.421 |


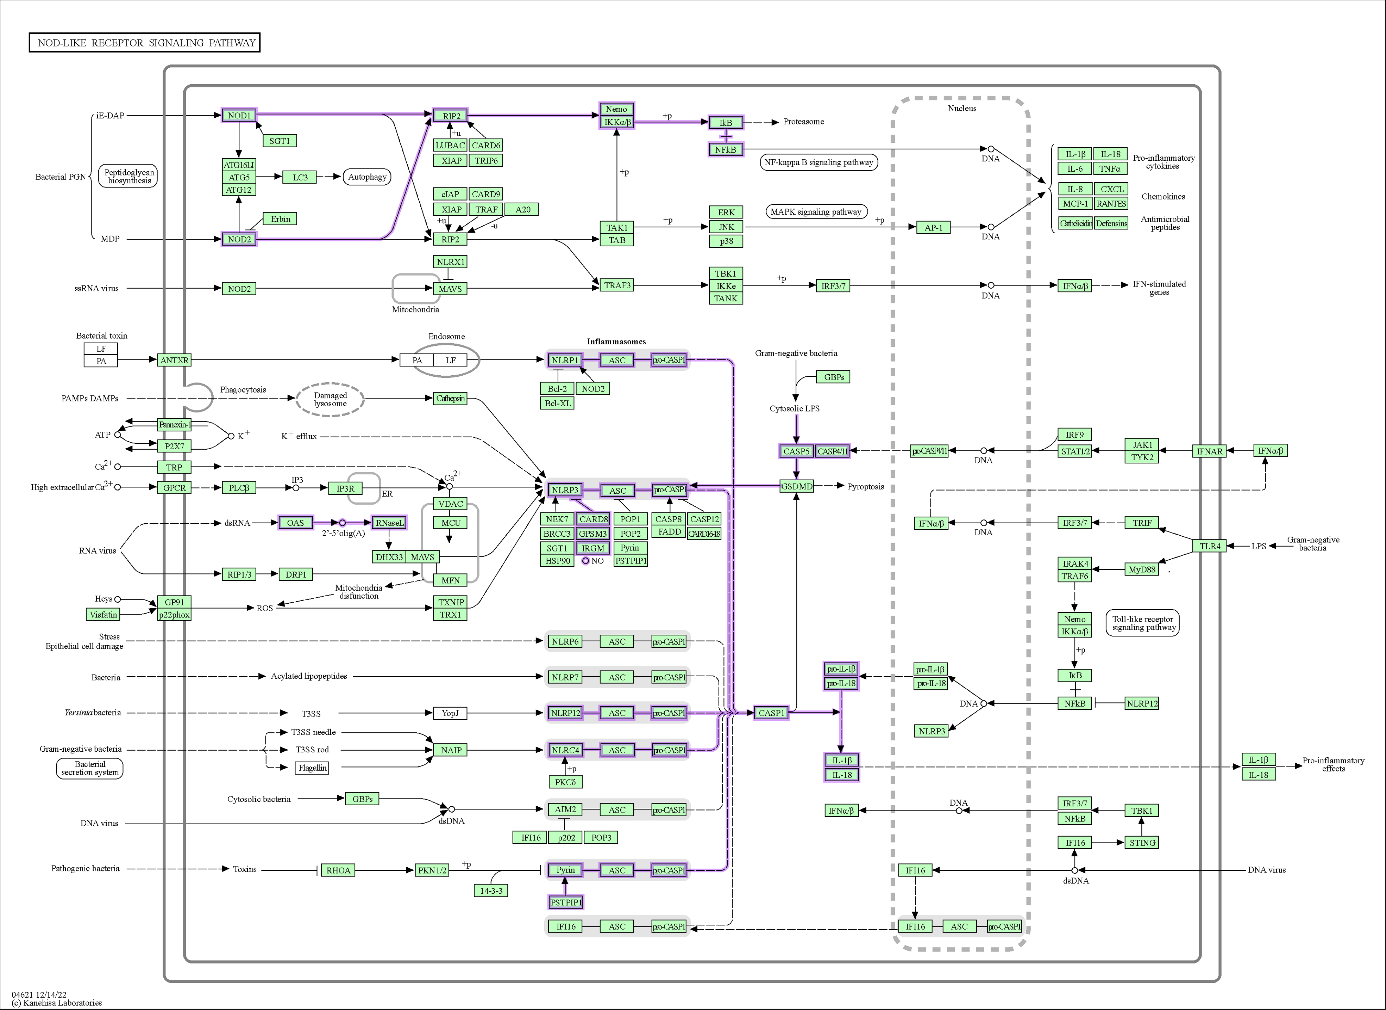


**Figure S1. Available Nod-like receptor signaling pathways in KEGG database.**
