# Supplementary material for: The Neglected Sibling: NLRP2 Inflammasome in the Nervous System
Source: Preprints.org preprint supplement (doi:10.20944/preprints202307.0152.v1), 2023-07-04
Supplement: Supplementary file 2 [file Table S1.xlsx]

## Sheet: Munka1
			Node protein hits	Full name	Interaction score
		1	SLA	Src-like-adapter;Adapter protein	0.752
		2	BECN1	Beclin-1	0.664
		3	PCDH11X	Protocadherin-11 X-linked; Potential calcium-dependent cell-adhesion protein	0.547
		4	GYG2	Glycogenin-2	0.515
		5	MRE11A	Double-strand break repair protein MRE11	0.490
		6	SUGT1	SGT1 homolog, MIS12 kinetochore complex assembly cochaperone	0.485
		7	EPS15	Epidermal growth factor receptor substrate 15	0.468
		8	NEUROD1	Neurogenic differentiation factor 1	0.466
		9	CAPN6	Calpain-6	0.462
		10	TXLNG	Gamma-taxilin	0.455
		11	DLGAP2	Disks large-associated protein 2	0.449
		12	APLNR	Apelin receptor	0.445
		13	SLC29A1	Solute carrier family 2	0.444
		14	AS3MT	Arsenite methyltransferase	0.423
		15	CCDC50	Coiled-coil domain-containing protein 50	0.421
